# Supplementary material for: Open access to regional geoid models: the International Service forthe Geoid
Source: Copernicus journal article supplement (doi:10.5194/essd-2020-394), 2020-12-23
Supplement: Supplementary file [file essd-2020-394-AC3-supplement.pdf]

# Open access to regional geoid models: the International Service for the Geoid

Mirko Reguzzoni<sup>1</sup>, Daniela Carrion<sup>1</sup>, Carlo Iapige De Gaetani<sup>1</sup>, Alberta Albertella<sup>1</sup>, Lorenzo Rossi<sup>1</sup>,  
5 Giovanna Sona<sup>1</sup>, Khulan Batsukh<sup>1</sup>, Juan Fernando Toro Herrera<sup>1</sup>, Kirsten Elger<sup>2</sup>, Riccardo Barzaghi<sup>1</sup>,  
Fernando Sansó<sup>1</sup>

<sup>1</sup>International Service for the Geoid, Department of Civil and Environmental Engineering, Politecnico di Milano, Milan,  
20133, Italy

<sup>2</sup>GFZ German Research Centre for Geosciences, Telegrafenberg, 14473, Potsdam, Germany

10

*Correspondence to:* isg@polimi.it

15

20

**Abstract.** The International Service for the Geoid (ISG, <https://www.isgeoid.polimi.it/>) provides free access to a dedicated and comprehensive repository of geoid models through its website. In the archive, both the latest releases of the most important and well-known geoid models, as well as less recent or less known ones, are freely available, giving to the users a wide range of possible applications to perform analyses on the evolution of the geoid computation research field. ISG is an official service of the International Association of Geodesy (IAG), under the umbrella of the International Gravity Field Service (IGFS). Its main tasks are collecting, analysing and redistributing local, regional and continental geoid models and providing technical support to people involved in geoid-related topics for both educational and research purposes. In the framework of its activities, ISG performs research taking advantage of its archive and organizes seminars and specific training courses on geoid determination, supporting students and researchers in geodesy as well as distributing training material on the use of the most common algorithms for geoid estimation. This paper aims at describing the data and services, including the newly implemented DOI Service for geoid models (<https://dataservices.gfz-potsdam.de/portal/?fq=subject:isg>), and showing the added value of the ISG archive of geoid models for the scientific community and technicians, like engineers and surveyors ([https://www.isgeoid.polimi.it/Geoid/reg\\_list.html](https://www.isgeoid.polimi.it/Geoid/reg_list.html)).

25

## 1 Introduction

30

The geoid, an equipotential surface of the Earth gravity field (Heiskanen and Moritz, 1967, Sansò and Sideris, 2013) has important applications in engineering for the definition of physical heights (Sansò et al., 2019), for example to compute them from ellipsoidal heights observed by GNSS techniques, and in geosciences, for example to determine the ocean geostrophic currents (Bingham et al., 2008, Knudsen et al., 2011). Because of its definition, the geoid is naturally modelled as a surface at a global level, typically through a truncated spherical harmonic expansion. The use of base functions on a spherical domain is justified by the fact that the geoid undulation is an anomalous quantity with respect to a given reference ellipsoid, while the

truncation of the series expansion depends on the spatial resolution of the model, e.g. a maximum spherical harmonic degree of 360 means an angular resolution of about 30 arc-minutes. The coefficients of this spherical harmonic expansion, representing a global geopotential model, have been estimated since the mid of the last century, especially exploiting satellite techniques (Merson and King-Hele, 1958, Barzaghi et al, 2015a), such as satellite orbit tracking and radar altimetry. With the advent of the new century, dedicated satellite gravity missions, i.e. CHAMP, GRACE and GOCE, were launched, significantly improving the knowledge of the gravity field. In this framework, the need of open accessing global models estimated by different research groups with different techniques led to the establishment of the International Centre for Global Earth Models (ICGEM) (Ince et al., 2019), an official IAG service with the aim of distributing global models and also providing computational and visualization online tools.

However, global models from dedicated satellite missions are limited in terms of spatial resolution due to the dampening of the gravity signal with the orbital height (Pail et al., 2010, Pail et al., 2011). The use of ground gravity data allows to increase the global model spatial resolution, but, as a consequence of the inhomogeneous spatial distribution of these data (Pavlis et al., 2012), a certain level of regularization to compute the coefficients of global base functions is required. This regularization can affect the quality of the geoid estimation also in areas where data spatial density is higher. For these reasons, and also for historical reasons related to the way in which the heights and the gravity data were observed, each country usually has its own geoid model. Biases are typically present between geoids of neighbouring countries, accounting for the different used conventions, e.g. the different reference tide gauge (Rummel and Teunissen, 1988, Sansò and Usai, 1995, Barzaghi et al., 2015b). These regional/local geoids can describe high frequency features that are generally not included into global models, unless considering an ultra-high maximum spherical harmonic degree. However, this would imply a strong numerical regularization when computing spherical harmonic coefficients, because the high-resolution information is not homogeneously available at a global scale. It is worth to notice that according to the Molodensky theory the height anomaly, i.e. the separation between the telluroid and the topography, is computed instead of the geoid (Sansò et al., 2019). The height anomaly can be converted into the geoid, e.g. by using the Bouger correction (Heiskanen and Moritz, 1967) or can be directly adopted as the height reference surface. In this case, the quasi-geoid is considered, that is the height anomaly mapped on the ellipsoid, and the national height systems are based on normal height instead of orthometric height. For the sake of simplicity, we will refer to both as geoid models hereafter, apart when this distinction is strictly required.

Regional geoid models are typically given as point-wise values over geographical grids or over sparse points (Forsberg and Tscherning, 2008). Like in the case of global models, there is a strong need from the scientific community, but also from the civil society for engineering applications, to access regional geoid models. In the framework of IAG, the International Service for the Geoid (ISG) has the task of providing an open access to such information through the establishment and the maintenance of a geoid repository.

Regional geoid models are mainly used for height conversion from ellipsoidal heights to orthometric or normal heights, or vice versa (Sansò et al., 2019). The models stored in the geoid repository can be further used for cross-validation, for comparison with global models and, in general, for providing alternative solutions to the scientific community, different from

the official ones typically released by national agencies. To reach these objectives, ISG developed a specific website with a geographic database.

The geoids archived by ISG correspond to countries or regions and data can be accessed via a list or by selecting them on a map. The repository is under the process of being implemented through a database in the framework of a web-GIS. To provide interoperable and reusable models, ISG is focussing on the provision of clear and complete metadata (Chan and Zeng, 2006, Longhorn, 2005) and the use of open, standardized and self-explanatory data formats (Cerri and Fuggetta, 2007).

The purpose of this paper is to introduce the reader to the service, by quickly revising the main steps of its history and of its activities performed inside the geodetic community (Section 2). Section 3 focuses on the ISG services: (1) the geoid repository, explaining its structure and current status, the data formats, with the description of the provided metadata, (2) the database indexing and DOI service, (3) the available height conversion online service and (4) the schools on the geoid determination. Finally, some examples of possible assessments exploiting the available models, implementing comparisons, and computing statistics are provided in Section 4. The paper closes with some general considerations and future perspectives of the service.

## 2 ISG, a service of the International Association of Geodesy

The International Service for the Geoid (ISG) is an official service of the International Association of Geodesy (IAG). It was founded in 1992 as IGeS (International Geoid Service) with the aim to be one of the operative arms of the International Geoid Commission (IGeC). The service is provided by a main centre at Politecnico di Milano and by individual scientists. ISG activities are in the framework of the International Gravity Field Service (IGFS), which includes other research centres and services: BGI (Bureau Gravimetric International, France), ICGEM (International Centre for Global Earth Models, Germany), COST-G (International Combination Service for Time-variable Gravity Fields, Switzerland), IDEMS (International Digital Elevation Model Service, USA), IGETS (International Geodynamics and Earth Tide Service, France).

The main tasks and activities of ISG are:

- to collect geoid estimates worldwide, validate them when possible, and disseminate them to users. Other auxiliary data, like global gravity models, useful for the geoid determination, may also be collected by ISG, without redistributing them if they are already provided by other IAG services. Since summer 2020, ISG is offering to assign digital object identifiers (DOI) to their geoid models. This DOI Service has been established in collaboration with GFZ Data Services and allows geoid models being cited in publications (e.g. Barzaghi et. al, 2020a and b);
- to collect, test and, when allowed, distribute software for the geoid determination;
- to conduct research on methods for the geoid determination, also defining optimal procedures for merging all available data and models;
- to organize international schools on geoid determination addressing both theoretical and practical topics, possibly every two years. During the schools, students are trained in the use of the relevant software for geoid computation;

- to support agencies or scientists in computing local and regional geoid models, especially in developing countries, also organizing special training courses;
- to disseminate training material and software on geoid computation, e.g. lecture notes of the schools;
- 100 • to issue the Newton's Bulletin, which has a technical and applied nature, collecting papers and reports on gravity and geoid;
- to establish and update a website to present the service activities, show and distribute the geoid models, software and publications, announce news and organize international schools on geoid determination; the geoid model distribution is also carried out via the catalogue of GFZ Data Services for DOI-referenced models only;
- 105 • to provide users with on-line services through the website, like the height conversion service exploiting any of the publicly available geoid models in the geoid repository (see Sec. 3.2).

### 3 ISG Services

The main services offered by ISG are the geoid repository, the database indexing and DOI service, the height conversion online service and the schools on the geoid determination. The first ones are data-oriented, while the latter is for educational purposes.

#### 110 3.1 The ISG geoid repository

ISG manages and preserves an openly accessible repository of regional, national and continental geoid models at a worldwide scale. The repository aims at storing and redistributing geoid models in a standardised data format, providing also ancillary information useful for gravity related analysis. Most models can be freely downloaded, some of them require the author's permission to be accessible and few are private and cannot be distributed. Consequently, they are classified as public, on-demand or private, respectively. The ISG geoid repository currently<sup>1</sup> stores 226 geoid models (158 gravimetric models, i.e., based on gravity data only, 8 geometric models, i.e., based on GPS/levelling data and 60 hybrid models, i.e., based on both gravity and GPS/levelling data) under different policies (168 public, 21 on-demand, and 37 private). The repository is visited by about 500 worldwide users per month. The coverage area is almost worldwide, with resolution grids up to 0.5 arc-minutes as shown in Fig. 1 (in log10 scale).

120 Particular attention is devoted to metadata and data interoperability. When stored, the geoids are collected both in the format provided by the owners and in ISG format, a standardized ASCII format developed on purpose. Details on this format will be described in the next subsection. Moreover, for each geoid, metadata are collected and archived, like the names of the authors, the publication year of the model, key reference publication(s) and a brief description on the computational method of the model. These pieces of information are then published on the website through the model-related webpages. An example of a  
125 model landing page is shown in Fig. 2.

---

<sup>1</sup> These statistics are based on the repository status at 10<sup>th</sup> November 2020

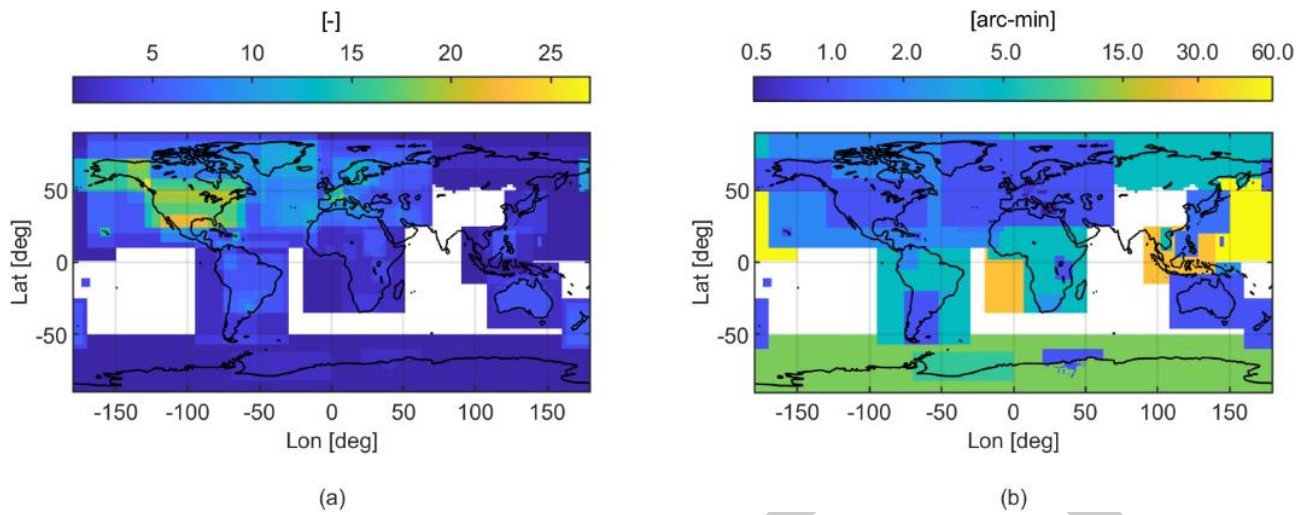

**Figure 1. Geoid repository. (a) number of available geoid models covering the same area, blank means missing data; (b) spatial resolution of the grid geoid models available at ISG. Colour bars show the highest spatial resolution available per location, log10 scale, units in arc-minutes;**

130

**ISG**  
International Service for the Geoid

PRESENTATION NEWS PROJECTS SERVICES NEWTON'S BULLETIN CONTACTS

**Services - Geoid Repository**  
Regional Models

## Colorado - USA (CoIWLSC2020)

Authors: R. Barzaghi, D. Carrion, Ö. Koç Created: 2020 Resp: R. Barzaghi  
Status: PUBLIC Licence: CC BY 4.0

**Description:**  
The CoIWLSC2020 quasi-geoid and geoid models are gravimetric models and have been computed by the Department of Civil and Environmental Engineering, Politecnico di Milano. The models have been computed in the frame of the International Association of Geodesy Joint Working Group 2.2.2 "The 1 cm geoid experiment" and the so called "Colorado experiment". The area covered by the models is 25.5°E ≤ longitude ≤ 256.5°E, 36.5°N ≤ latitude ≤ 38°N with a grid spacing of 2' in both latitude and in longitude. The computation is based on the remove-compute-restore technique with XGM2006 being used as a reference field. The topographic effects were treated using a Residual Terrain Correction (RTC) by solving the spectral filter problem of RTC using Earth2014 and ERTM2160 models. The input gravity data include terrestrial and airborne data combined using Least-Squares Collocation (LSC). The final estimation was carried out using Windowed LSC (WLSC). The mean accuracy of the geoid models, when compared against GSVS17 GPS-leveling, is at the 2.4-2.8 cm level.

**Model Citations:**  
R. Barzaghi, D. Carrion, Ö. Koç (2020): The PolIM quasi-geoid based on windowed Least-Squares Collocation for the Colorado Experiment. CoIWLSC2020. V. 1.0. GFZ Data Services. <https://doi.org/10.5880/ISG.2020.001>  
R. Barzaghi, D. Carrion, Ö. Koç (2020): The PolIM geoid based on windowed Least-Squares Collocation for the Colorado Experiment. CoIWLSC2020. V. 1.0. GFZ Data Services. <https://doi.org/10.5880/ISG.2020.002>

**References:**  
V.N. Grigoradis, G.S. Vergos, R. Barzaghi, D. Carrion, Ö. Koç (2020). Collocation and FFT-based geoid estimation within the Colorado 1 cm geoid experiment. *Journal of Geodesy*. Special Issue on Reference Systems in Physical Geodesy.

**Web of Science ID:**  
DRCID:DATA202022018150699

**DOI:**  
<https://doi.org/10.5880/ISG.2020.001> (quasi-geoid in ISG format)  
<https://doi.org/10.5880/ISG.2020.002> (geoid in ISG format)

Retrieve quasi-geoid Retrieve geoid Retrieve quasi-geoid ISG format Retrieve geoid ISG format Send email

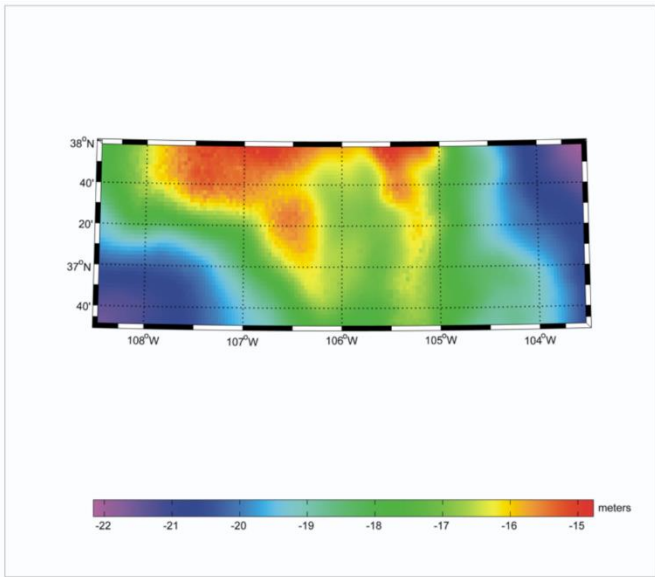

© ISG at DICA Politecnico di Milano - P.za Leonardo da Vinci, 32 - 20133 MILANO (ITALY)  
ph. + 39.02.23996527 - FAX: +39.02.23996530 - e-mail: [isg@polimi.it](mailto:isg@polimi.it)

Search in ISG Website

Links:

- IAG - International Association of Geodesy
- IGFS - International Gravity Field Service
- BGI - International Gravimetric Bureau
- COST-G - Combination Service for Time-variable Gravity Fields
- ICGEM - International Centre for Global Earth Models
- IDEMS - International DEM Service
- IGETS - International Geodynamics and Earth Tide Service

DATA CITATION INDEX

doi

Figure 2. Geoid repository, example of a webpage describing the content of the selected available geoid.

The importance and the scientific relevance of such service does not only depend on the amount of available data but also on the completeness and clarity of the provided information. For this purpose, ISG provides geoid models in a format that has been designed to be easily understood and managed by the final users.

### 3.1.1 The ISG data format

140 The ISG format provides local/regional geoid/quasi-geoid models given as undulations with respect to a reference ellipsoid on a grid or sparse points. The file is in ASCII format with the extension .isg. The first version of the ISG ASCII format was released in 2015 and updated in 2018 (version 1.01). In July 2020, a major new release, version 2.0, was published, mainly introducing more metadata to better characterize the content of the file and also allowing to store sparse point data. All the new models will be published with version 2.0. In addition, before an already published model is assigned with a DOI, it will  
145 be transformed in ISG ASCII version 2.0

Each individual data file consists of three sections: a) the optional comment section, starting at the beginning of the file and ending just before the keyword “begin\_of\_head”; b) the header section, starting with the keyword “begin\_of\_head” and ending with the keyword “end\_of\_head”, which contains textual and numerical parameters; c) the data section, starting just after the keyword “end\_of\_head”, which contains the undulation values. To increase data interoperability, section (a) and (b) were  
150 designed with the same scheme of the .gfc file, distributed by ICGEM and providing global model coefficients (Ince et al., 2019).

In the comment section (a), three paragraphs are strongly recommended, the first one with the licence under which the data are distributed, the second one with the reference to cite when using the data, the third one indicating the data provider and the institution distributing the model.

155 In ISG format, the header section (b) is composed by structured metadata. It can be conceptually divided into three parts. The first contains textual metadata that are required to characterize the model, such as:

- the name of the model and the year of computation,
- the type of the model (gravimetric, geometric or hybrid),
- the classification between geoid and quasi-geoid,
- 160 • the fact that the data are sparse or gridded, and in case the ordering of the gridded data,
- the reference ellipsoid and datum, the reference frame, and the tidal system,
- the fact that the coordinates are geodetic or projected and in case the type of projection,
- the units of the undulation data and the coordinate units.

The second part contains numerical metadata that are mainly required to georeferencing the undulation values, such as

- 165 • the bounding box of the undulation dataset, i.e. minimum and maximum coordinates,
- the grid step and the number of rows and columns if the data are gridded (the number of rows can be used in sparse data to specify the number of points),
- the no-data value for missing points inside the grid structure.

170 Finally, the third part contains information about the file, such as the creation date and the format version. Metadata and their keywords depend on the format version. The file format specifications for all the possible versions are available at a dedicated page on the ISG website ([http://www.isgeoid.polimi.it/Geoid/format\\_specs.html](http://www.isgeoid.polimi.it/Geoid/format_specs.html)).

The data section was originally developed to contain the gridded undulation values, but from the format version 2.0 it is also possible to store sparse data by providing the point coordinates along with the undulation values. In case of gridded data, the point coordinates are defined in the header section and the undulation values are always stored row by row, being the default ordering from North to South, each row going from West to East.

### 3.2 The ISG database indexing and DOI service

The sharing of reliable, citable and well-described research data are key elements for Open Science. The European Union is raising the attention to the importance of data sharing and metadata through actions, policies and directives, such as INSPIRE or the “European legislation on open data and the re-use of public sector information” (EU Open Data Directive). In addition, the new Horizon Europe programme, which is about to start, is requiring not only the open access to research papers but also the open access to the data. To effectively archive, discover and access data, it is crucial to prepare and store complete metadata and to have access to well-known archives with a stable link. In addition, to grant proper credit to research authors, it is very important to allow for the data citation as well. Assigning Digital Object Identifiers (DOI) to research data is an important instrument for this and best practice for FAIR Sharing Data (e.g. Fenner et al., 2019, Hodson et al., 2018, Wilkinson et al., 2016). Datasets with assigned DOIs are fully citable in scholarly literature that enables tracking of data usage via citation metrics and provides credit for researchers and institutions

185 For these reasons, ISG has established agreements with (1) Clarivate’s the Data Citation Index™ (<https://clarivate.com/webofsciencegroup/solutions/webofscience-data-citation-index/>) and (2) with GFZ Data Services (<https://dataservices.gfz-potsdam.de/portal/>), the research data repository for the Geosciences domain, hosted at GFZ German Research Centre for Geosciences (<https://www.gfz-potsdam.de/en/home/>).

#### 3.2.1 Data Citation Index

Clarivate’s “Data Citation Index™” serves as “single point of access to quality research data from global repositories across disciplines” that are “linked to literature articles in the Web of Science.™” (<https://clarivate.com/webofsciencegroup/solutions/webofscience-data-citation-index/>). Geoid models of ISG are indexed in the Data Citation Index and the accession number is indicated on the geoid model website (see lower left of Figure 3).

#### 3.2.2 DOI Service

Since summer 2020, ISG, in collaboration with GFZ Data Services, has extended their services by offering the assignment of DataCite DOIs to geoid models archived in the ISG geoid repository. This includes the generation and provision of standardised, machine-readable metadata following international standards (DataCite, ISO19115) that are complementary to



200 the disciplinary metadata already collected for ISG geoid models and openly accessible via a standard application programming interface (API). An individual DOI is assigned to each geoid (or quasi-geoid) model by GFZ Data Services, which is also serving as an additional archive of the ISG repository. The agreed licence for geoid models is the Creative Commons Attribution 4.0 (CC BY 4.0) Licence. As already stated, the model data are converted to the ISG 2.0 format before the DOI assignment, thus including the model citation and licence information in the comment section of the file. Geoid models 205 assigned with DOI can be additionally discovered via the catalogue of GFZ Data Services and via the repository machine-readable DOI landing pages that are embedding schema.org (https://schema.org/). To this aim, GFZ Data Services has created a new internal “datacentre” for ISG geoid models (https://dataservices.gfz-potsdam.de/portal/). The DOI landing pages at GFZ Data Services are closely cross-linked with the model pages at ISG, as well as with key articles or reports describing the geoid models. Different types of models, e.g. geoids and quasi-geoids, gravimetric and hybrid solutions, computed in the same 210 framework are cross-referenced on the DOI landing pages and in the DataCite metadata of each model. The DOI links are also added to the model pages at ISG (see figure 3)

**ISG Geoid Repository**

**Services - Geoid Repository**

**Regional Models**

**Colorado - USA (CoWLSC2020)**

Authors: R. Barzaghi, D. Carrion, Ö. Koç Created: 2020 Respi: R. Barzaghi License: CC BY 4.0

**Description:**  
The CoWLSC2020 quasi-geoid and geoid models are gravimetric models and have been computed by the Department of Civil and Environmental Engineering, Politecnico di Milano. The models have been computed in the frame of the International Association of Geodesy Joint Working Group 2.2.2 "The 1 cm geoid experiment" and the so called "Colorado experiment". The area covered by the models is 21.0 5' x longitude x 2.06 5' x 30.5' x latitude x 30' x a grid spacing of 7" in both latitude and longitude. The computation is based on the reverse-compute-restore technique with IGOE198 being used as a reference field. The topographic effects were treated using a Residual Terrain Correction (RTC) by solving the spectral filter problem of RTC using Earth2014 and ERTM2100 models. The input gravity data include terrestrial and airborne data combined using Least-Squares Collocation (LSC). The final estimation was carried out using Windowed LSC (WLS). The mean accuracy of the geoid models, when compared against GSV217 GPS/levelling, is at the 2.4-2.8 cm level.

**Model Citations:**  
R. Barzaghi, D. Carrion, Ö. Koç (2020). The PoIMI quasi-geoid based on windowed Least-Squares Collocation for the Colorado Experiment: CoWLSC2020. V. 1.0. GFZ Data Services. <https://doi.org/10.5880/ISG.2020.001>  
R. Barzaghi, D. Carrion, Ö. Koç (2020). The PoIMI geoid based on windowed Least-Squares Collocation for the Colorado Experiment: CoWLSC2020. V. 1.0. GFZ Data Services. <https://doi.org/10.5880/ISG.2020.002>

**References:**  
V.N. Grigoriadis, G.S. Vergos, R. Barzaghi, D. Carrion, Ö. Koç (2020). Collocation and FFT-based geoid estimation within the Colorado 1 cm geoid experiment. Journal of Geodesy, Special Issue on Reference Systems in Physical Geodesy.

**Web of Science ID:**  
DRCI:DATA2020022018150699

**DOI:**  
<https://doi.org/10.5880/ISG.2020.001> (quasi-geoid in ISG format)  
<https://doi.org/10.5880/ISG.2020.002> (geoid in ISG format)

**GFZ Data Services Data Catalogue**

Portal | Submit Metadata | About/Contact | Data Readiness Roadmap | RDM recommendations for PhD students

Search (press ESC to close suggestions)

Spatial Filter Close Map

Filter global data

Current Selection (Link)

Found 4 datasets.

The Auth quasi-geoid based on 1D FFT with Wong-Gore modification of the Stokes kernel for the Colorado Experiment: CoLFW2020

Authors: Grigoriadis, Vasilios N.; Vergos, Gerasimos S.

**Files**

Model download  
Model ISG webpage  
License: CC BY 4.0

**Model Citations:**  
R. Barzaghi, D. Carrion, Ö. Koç (2020). The PoIMI quasi-geoid based on windowed Least-Squares Collocation for the Colorado Experiment: CoWLSC2020. V. 1.0. GFZ Data Services. <https://doi.org/10.5880/ISG.2020.001>  
R. Barzaghi, D. Carrion, Ö. Koç (2020). The PoIMI geoid based on windowed Least-Squares Collocation for the Colorado Experiment: CoWLSC2020. V. 1.0. GFZ Data Services. <https://doi.org/10.5880/ISG.2020.002>

**References:**  
V.N. Grigoriadis, G.S. Vergos, R. Barzaghi, D. Carrion, Ö. Koç (2020). Collocation and FFT-based geoid estimation within the Colorado 1 cm geoid experiment. Journal of Geodesy, Special Issue on Reference Systems in Physical Geodesy.

**Web of Science ID:**  
DRCI:DATA2020022018150699

**DOI:**  
<https://doi.org/10.5880/ISG.2020.001> (quasi-geoid in ISG format)  
<https://doi.org/10.5880/ISG.2020.002> (geoid in ISG format)

215 **Figure 3: Overview on the relation between ISG and GFZ Data Services for DOI-referenced geoid models of the Colorado experiment (CoWLSC2020). This project includes a quasi-geoid model (Barzaghi et al., 2020a) and a geoid model (Barzaghi et al., 2020b). Both models can be accessed via the dedicated webpage in the ISG geoid repository (on**

the left) and via the DOI landing pages in the GFZ Data Services (on the right). The “File” section of the DOI landing page includes the links to the model file and the corresponding webpage in the ISG repository. On the other side, the ISG model webpage is enhanced with the recommended citations of the DOI-assigned models and the links to the DOI landing pages at GFZ Data Services. **The arrows show the cross-references between the two webpages.**

220

### 3.3 The ISG height conversion web-service

ISG offers a height conversion web-service to the users. They can provide the coordinates of one or more points (in the latter case through a CSV file containing three columns, namely latitude, longitude and height to be converted) and, after selecting  
225 the geoid model and the interpolation method, the web-service returns the conversion from ellipsoidal to orthometric height or vice versa. Once the user provides the point coordinates, only the geoid models containing at least one of these points are listed and can be selected by the user for the height conversion. This is possible by exploiting the model bounding box information that is available in the model file header as defined according to the ISG format.

As for the algorithmic point of view, the conversion is based on the formula  $H = h - N$ , relating the ellipsoidal height  $h$  and  
230 the orthometric height  $H$  through the geoid undulation  $N$ . **Due to the fact that geoid models used by this service are given on a grid, the currently available interpolation methods** are a bilinear interpolation among the four grid knots that **are the closest** to the input point and the inverse distance weighting interpolation. **Other interpolation methods will be made available in the future.**

As for the software implementation point of view, the web-service is divided into front-end and back-end, the former providing  
235 a user interface and the latter performing the calculations. The front-end is the "visible" part of the application, it is implemented by using an HTML page and JavaScript. The HTML page contains a form with all the needed fields for the height conversion according to the web-service created on the back-end (see Figure 4). The interface is designed to change as the user interacts with the application and selects the different options (single or multiple point coordinates). There are also checks on the input file size and format when the user asks for the conversion of more than one point.

240

**Figure 4. Webpage to access the ISG height conversion web-service**

245 The back-end is the core of the web-service, performing the required computation without increasing the burden of the front-end. In this way the web-service can be modified or updated without interfering with the front-end. In order to implement the back-end, a REST API (Representational State Transfer Application Programming Interface) was created in **Django, a high-level Python web framework that allows performing** mathematical calculations using Python with the NumPy library. Four different endpoints were created for the geoid model research and the height conversion, both for a single point and a set of points. A sketch of the logical structure of this web-service is provided in Figure 5.

250 All requests from the front-end to the back-end rely **on the HTTP POST** method, i.e. enclosing the data in the body of the request messages instead of storing it, while the answers from the back-end are transmitted through a **JSON file, which is** directly visualized in the HTML page.

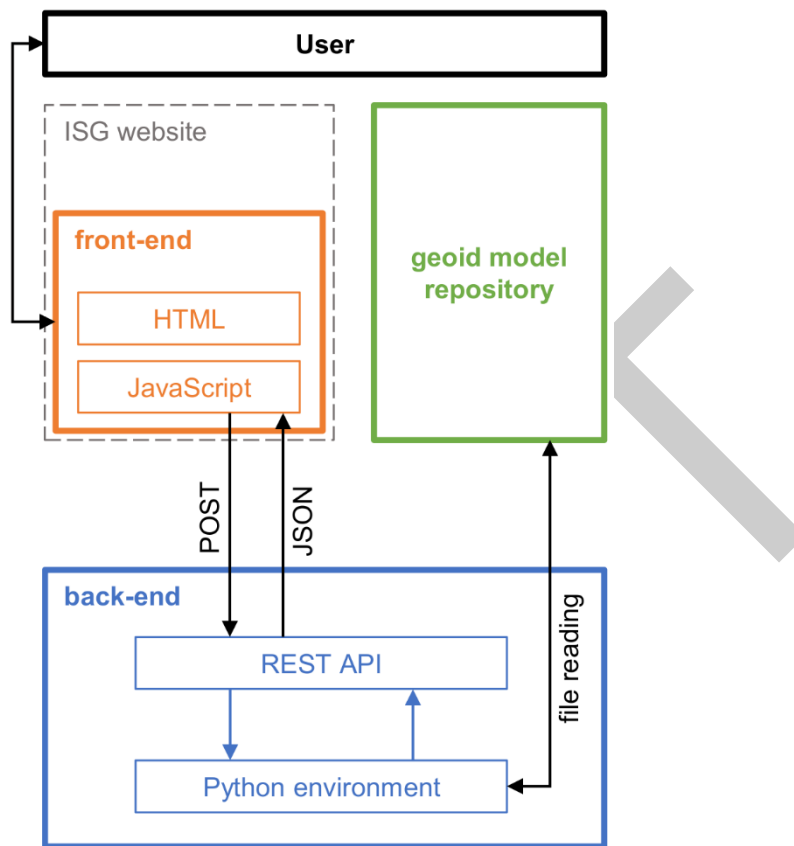

Figure 5. Logical structure of the height conversion web-service

255

### 3.4 Geoid schools

Geoid schools, i.e. the organisation and support of technical schools on geoid estimation and related topics, are the earliest and central educational task of ISG. Beginning with the first International School on “The determination and use of the geoid” (1994 in Milan), ISG’s Geoid Schools have developed to an international reference for geoid computation training and gravity field modelling. The general purpose of the full-week intensive geoid school is to prepare graduate students, young researchers, employees of national agencies and services or industry staff, for the computation and usage of gravimetric geoid models for scientific and technical applications in geodesy. The schools provide a good opportunity to familiarize with the latest developments in geoid determination and to improve international contacts and collaborations among scientists dealing with gravity field modelling. Theoretical lectures are followed by computer exercises using software that is also distributed by ISG.

265 The general frame of the lectures is the following:

- introduction to physical geodesy;
- computation and use of high degree and ultra-high degree geopotential models;
- geoid computation using Stokes’ integral and collocation;

- terrain effects in geoid estimation;
- 270 • Fast Fourier Transform (FFT) techniques in geodesy;
- seminars on specific topics depending on the research fields of the guest tutors.

Lecture notes of the courses are distributed to the participants, as well as the required software and the exercises. Such material can be also provided upon request through the ISG website. Since 1994, 12 editions of the geoid school have been organized, held in 10 countries and attended by 340 people (see Table 1):

275

**Table 1. List of the Geoid Schools organized by ISG since its foundation.**

| Location                                                              | Date               | Attendees |
|-----------------------------------------------------------------------|--------------------|-----------|
| Mongolian University of Science and Technology, Ulaanbaatar (MNG)     | 6-10/06, 2016      | 30        |
| Universidad Técnica Particular de Loja, Loja (ECU)                    | 7-11/10, 2013      | 15        |
| Research Institute Elektropribor, S. Petersburg (RUS)                 | 28/06 – 2/07, 2010 | 15        |
| National University of La Plata, La Plata (ARG)                       | 7-11/09, 2009      | 23        |
| Politecnico di Milano, Como Campus, Como (ITA)                        | 15-19/09, 2008     | 25        |
| Niels Bohr Institute, University of Copenhagen, Copenhagen (DNK)      | 19-23/06, 2006     | 24        |
| Budapest University of Technology and Economics, Budapest (HUN)       | 31/01 – 5/02, 2005 | 49        |
| University of Thessaloniki, Thessaloniki (GRC)                        | 30/08 – 5/09, 2002 | 30        |
| Department of Survey and Mapping Malaysia, Johor - Bahru (MYS)        | 21-25/02, 2000     | 41        |
| Politecnico di Milano, Milan (ITA)                                    | 15-19/02, 1999     | 23        |
| Instituto Brasileiro de Geografia e Estatística, Rio de Janeiro (BRA) | 10-16/09, 1997     | 31        |
| Politecnico di Milano, Milan (ITA)                                    | 10-14/10, 1994     | 34        |

Beyond the international geoid schools, also ad-hoc training periods are carried out by ISG in order to support foreign institutions and scientists in the field of geoid computation.

#### 280 **4 Geoid comparative analyses based on the ISG repository**

Relative comparisons can be carried out between the available geoids stored in the ISG repository. Such comparisons can reveal useful information, like possible mismatches between estimated geoids, for example when two models referring to the same area are computed at different epochs or with different techniques or published by different authors. Additionally, local or regional models can be compared with global gravitational models. In the following, examples of such kind of relative assessments are described.

285

##### **4.1 Assessment of the evolution over time of the same geoid computed by the same authors.**

As an example of evolution over time, the Japanese geoid can be considered. The ISG geoids repository collected several versions of Japanese national geoids computed by the Geographical Survey Institute. Among them, the group of hybrid geoids published in 1996, 2000 and 2011 can be compared to evaluate their evolution over time. The first geoid is GSIGEO96 (Fukuda et al., 1997). It is provided on a 3'x3' grid and it is referred to the GRS80 ellipsoid in the ITRF89 frame (Fig. 6a). It has been

290

computed by fitting the JGEOID93 gravimetric geoid model to **the 806 sites of the nationwide GPS/levelling network** via Least Squares Collocation (LSC). The second geoid, named GSIGEO2000 (Kuroishi, 2000, Fig. 6b), is provided on a 1'x1.5' grid and it is referred to the GRS80 ellipsoid in the ITRF94 frame at epoch 1997.0 (Fig. 6b), i.e. the Japanese Geodetic Datum 2000 (JGD2000). It has been computed by fitting the JGEOID2000 gravimetric geoid model to the nationwide net of GPS/levelling data via LSC. The third geoid is the GSIGEO2011 (Miyahara et al., 2014). Again, this model is provided on a 1'x1.5' grid and it is referred to the GRS80 ellipsoid in the ITRF94 frame at epoch 1997.0 (Fig. 6c), i.e. the Japanese Geodetic Datum 2000 (JGD2000). In this case, it has been computed by fitting the JGEOID2008 gravimetric geoid model to GNSS/levelling data at 971 sites (786 GEONET stations, 156 benchmarks and 29 tidal stations) via LSC.

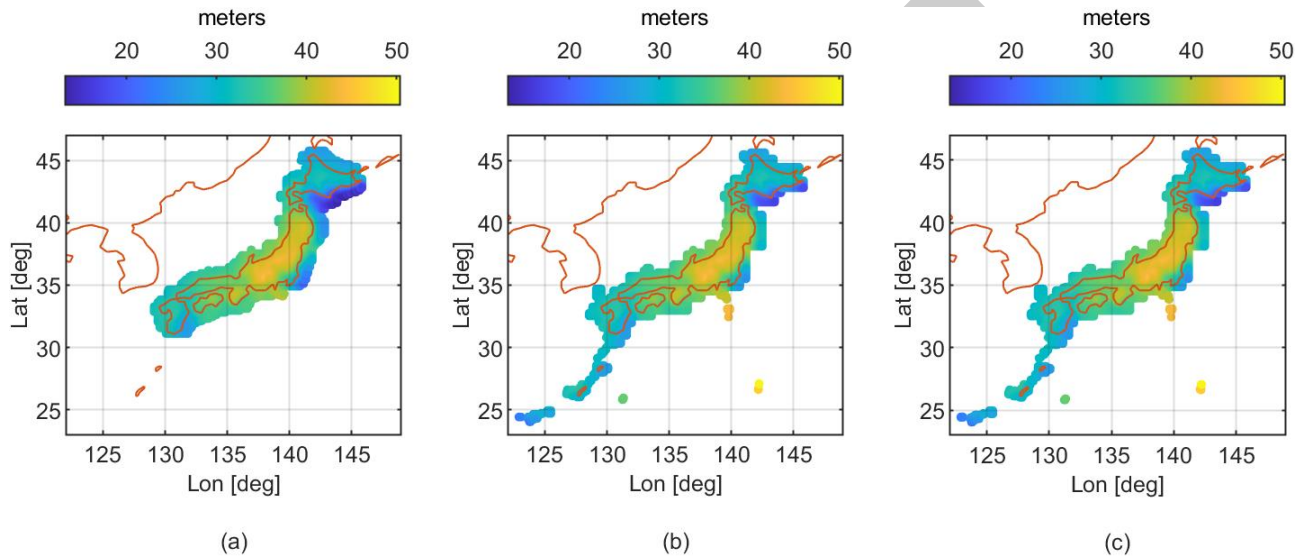

300 **Figure 6. Evolution of Japanese geoid models over time. The three panels represent the undulation with respect to the reference ellipsoid of: (a) GSIGEO96, (b) GSIGEO2000 and (c) GSIGEO2011**

Due to the different resolutions and grid boundaries, the comparison has been done stepwise by interpolating the most recent geoid on the same grid of the previous model. Once the grids have been made consistent, a plane fitting their differences has  
 305 been estimated and removed before statistics computation. This was done for reducing the impact of possible mismatches due to different reference frames and height datums. Table 2 shows the main statistics of the differences between two consecutive versions of the same geoid model.

**Table 2. Statistics of the differences between the analysed Japanese geoids.**

| Geoid A    | Geoid B    | Grid Resolution | Std [m] | Min [m] | Max [m] |
|------------|------------|-----------------|---------|---------|---------|
| GSIGEO96   | GSIGEO2000 | 3' x 3'         | 0.184   | -1.017  | 1.060   |
| GSIGEO2000 | GSIGEO2011 | 1' x 1.5'       | 0.104   | -0.610  | 0.891   |

310

From these statistics, it can be noted that the two refinements of the GSIGEO geoid model have a different impact. The standard deviation of the residuals between the “editions” 1996 and 2000 is almost 19 cm while between the “editions” 2000 and 2011 is halved, about 10 cm. This is mainly due to a better quality and larger terrestrial gravity database and also to an increase of the computational power that allowed to better estimate high frequency behaviours around the consolidated estimates of the long wavelength. It is interesting to look at the spatial distribution of the residuals, shown in Fig. 7. Referring to GSIGEO96-00, high amplitude residuals are concentrated along the eastern border, with ranging down to about -1.0 meter; referring to GSIGEO00-11, residuals are generally smaller but still localized in the eastern and northern borders, with opposite amplitude with respect to GSIGEO96-00; areas where residuals of GSIGEO96-00 and GSIGEO00-11 are different for more than 50 cm, suggest disagreement between the two refinements.

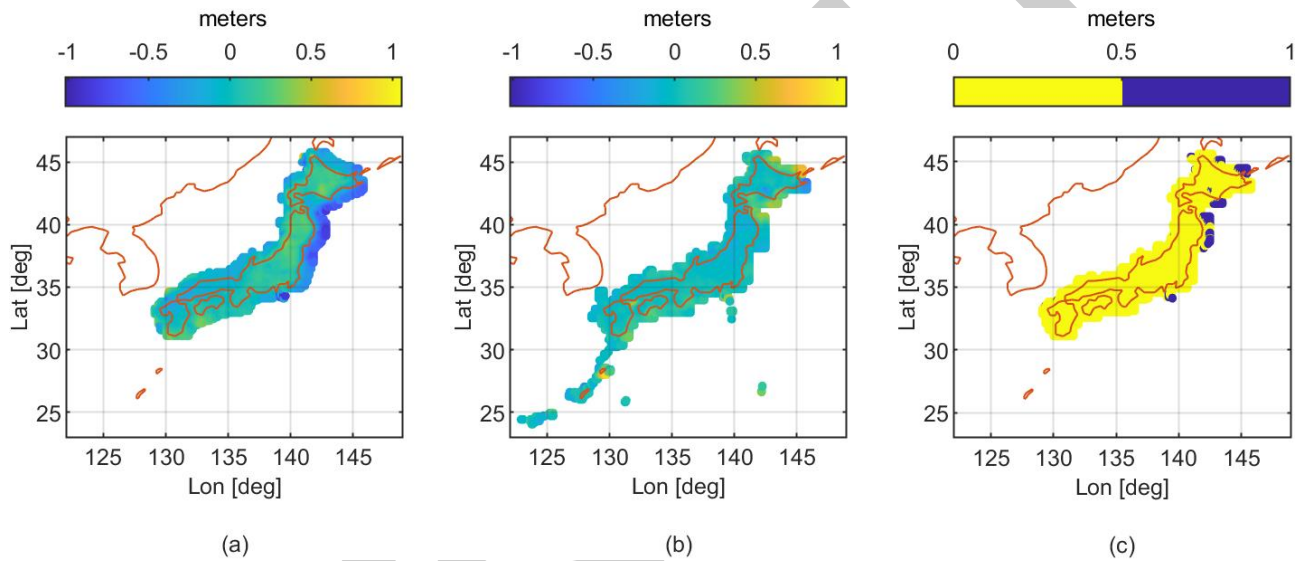

**Figure 7. Difference between the analysed Japanese geoids. (a) GSIGEO96 – GSIGEO2000; (b) GSIGEO2000 – GSIGEO2011; (c) Combined agreement between the considered Japanese geoids. In yellow areas the difference between GSIGEO96–00 and GSIGEO00-11 is less than 50 cm while in blue areas is more than 50 cm.**

#### 325 4.2 Comparison of geoids computed by different authors and with different techniques

The ISG repository contains also collections of the same national geoid computed with different techniques by different authors. As an example, one can consider the three geoids of the Sudan and South-Sudan publicly available in the ISG database. In this case, it can be interesting to assess the agreement between them and evaluate possible mismatches and inconsistencies. Sudan KTH-SDG08 (Abdalla, 2009) is the first Sudanese gravimetric geoid model considered in this kind of comparison. It has been computed by applying a least squares modification of Stokes formula. Two sets of in-situ regional gravity data have been used: the first one has been provided by Geophysical Exploration Technology (GETECH) group from the University of

Leeds, UK. This dataset contains gravity observations that do not cover uniformly the Sudanese region. The second dataset is provided by the International Gravimetric Bureau (BGI) and contains only few scattered points measured over the neighbouring countries. The long-wavelength contribution has been modelled by using two different geopotential models: The EIGEN-GRACE02S satellite-only model (Reigber et al., 2005) has been used in the modified Stokes formula, whereas the EIGEN-GL04C combined model (Förste et al., 2006) has been used to enrich the local gravity coverage over the areas with missing data. SRTM has been used to compute the topography effects on the geoid. The KTH-SDG08 model is provided on a  $12' \times 12'$  grid over the computation area bounded by  $4^\circ$  N to  $23^\circ$  N in latitude and  $22^\circ$  E to  $38^\circ$  E in longitude. The geoid heights are given with respect to the GRS80 reference ellipsoid (Fig. 8a).

The second Sudanese geoid, called simply Sudan has been computed by Fashir and Kadir in 1998 (Fashir and Kadir, 2000). This geoid model has been computed for the whole region of Sudan and South-Sudan, ranging from  $4^\circ$  N to  $24^\circ$  N in latitude and  $22^\circ$  E to  $38^\circ$  E in longitude. The EGM96 geopotential model truncated to degree and order 70 has been combined with surface gravity data and modified Stokes's kernel to generate the geoid file on a  $10' \times 10'$  grid (Fig. 8b).

The third model for this comparison is Sudan SUD-GM2014 (Godah and Krynski, 2015). This has been computed on a  $5' \times 5'$  grid using the GO\_CONS\_GCF\_2\_TIM\_R4 global geopotential model (Pail et al., 2011), with terrestrial mean free-air gravity anomalies and the high-resolution SRTM30\_PLUS global digital elevation model. The computations of the Sudan SUD-GM2014 have been performed using the remove-compute-restore procedure and the LSC method (Fig. 8c).

As previously described, the comparison has been carried out interpolating the three geoids on the area covered by all of them and with a grid spacing equal to the lowest available resolution ( $12' \times 12'$ ). Relative differences have been computed and analyses have been conducted on the residuals obtained after removing the interpolating plane, which models possible mismatches due to different datum and reference frame.

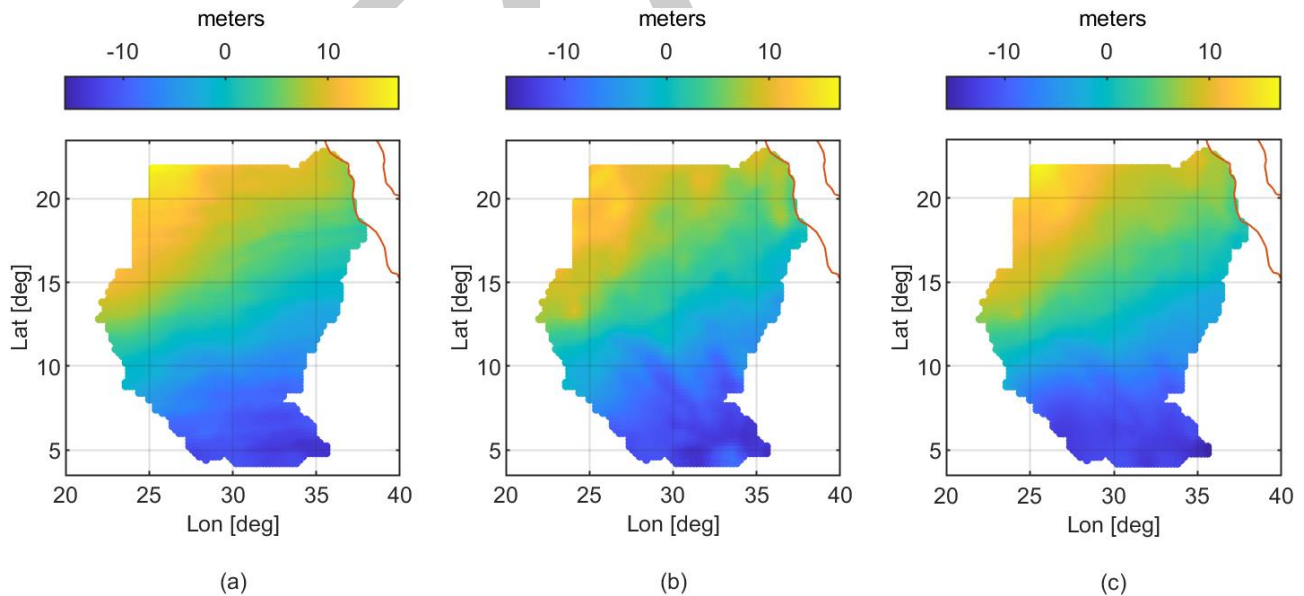



355

**Figure 8. Sudanese geoid models. The three panels represent the undulation with respect to the reference ellipsoid of (a) Sudan KTH-SDG08; (b) Sudan; (c) Sudan SUD-GM2014. All the models were considered only inside the national borders of Sudan and South-Sudan.**

360

Table 3 shows the statistics of the residuals obtained with the three different combinations. Their standard deviations are quite similar and less than 1 m. What is interesting to see is that, despite most of the grid points show residuals below this value (ranging from 75% to 82%), their spatial distribution is quite different, as shown in Figure 9.

**Table 3. Statistics of the difference between the analysed Sudanese geoids.**

| Case | Geoid A         | Geoid B          | Grid Resolution | Std [m] | Min [m] | Max [m] | Abs < 1m |
|------|-----------------|------------------|-----------------|---------|---------|---------|----------|
| A    | Sudan KTH-SDG08 | Sudan            | 12' x 12'       | 0.942   | -4.628  | 3.377   | 75%      |
| B    | Sudan KTH-SDG08 | Sudan SUD-GM2014 | 12' x 12'       | 0.829   | -2.294  | 3.686   | 82%      |
| C    | Sudan           | Sudan SUD-GM2014 | 12' x 12'       | 1.001   | -3.797  | 4.180   | 77%      |

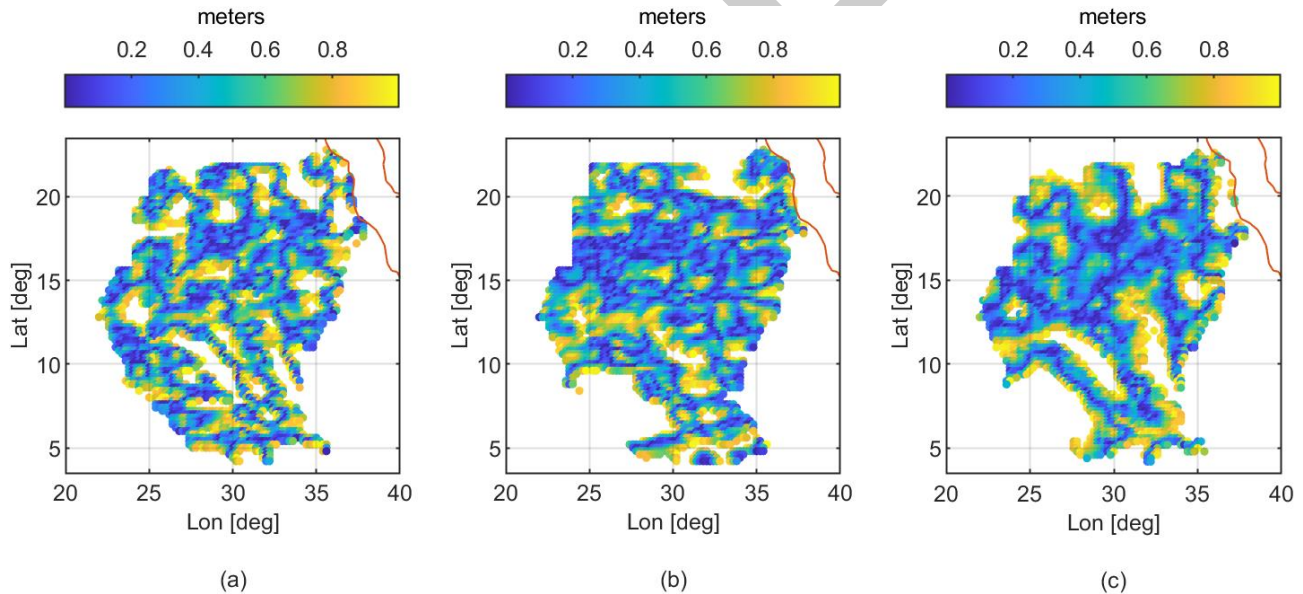

365

**Figure 9. Sudanese geoids comparison, residuals with absolute value less than 1 meter. (a) case A; (b) case B; (c) case C.**

370

It can be noted as Sudan KTH-SDG08 and Sudan SUD-GM2014 show a better agreement (case B) apart from the south-western area where differences are remarkable. This area shows disagreement also in case C (Fig 9c), thus implying that Sudan SUD-GM2014 model behaves significantly different from the others in this area. Along the north-eastern border of Sudan, residuals obtained in all the three comparisons are large, which might be attributed to a different gravity data coverage.

Such kind of analysis does not aim at assessing which is the best model but provide useful information to evaluate areas that can be considered as more reliable than others when similarly modelled by different geoid models. Figure 10 shows the areas where the residuals of the three comparisons are similar. In this analysis the three models are considered as similar if their geoid values are different by less than the minimum standard deviation of the residuals of the three comparisons, here 0.829 m (case B). Under this assumption, 48% of the grid points have a good agreement among all three considered geoids. This allows the conclusion that these areas are, more likely, the most reliable estimates of the geoid.

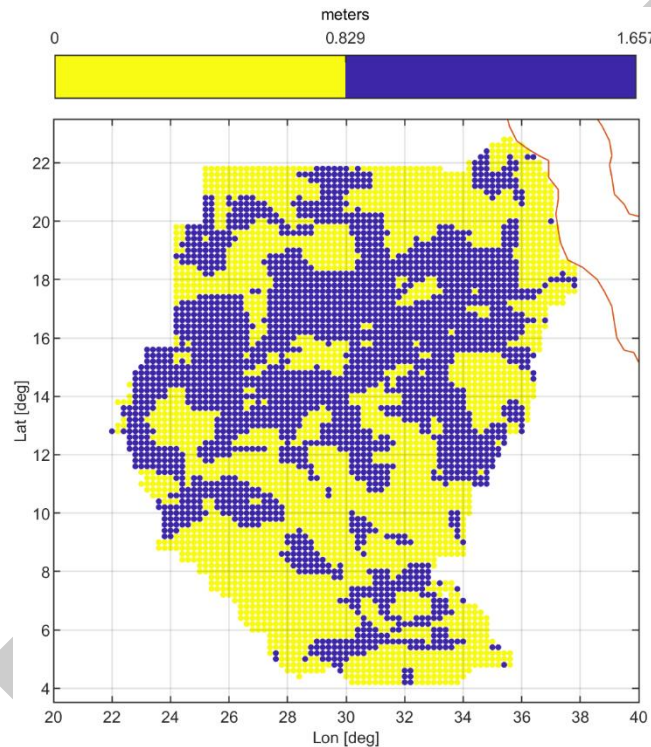

**Figure 10. Combined agreement between Sudanese geoids. Yellow grid points show where all three considered geoids differ for a value below the minimum obtained standard deviation in the three trials, then considered in agreement.**

#### 380 4.3 Comparison of local geoids with global models

The agreement between local and global models can be assessed, as well. Global models can be used at their full resolution to synthesize the geoid at arbitrary points of a local area. This is an advantage with respect to local geoids but at cost of possible mismodelling of local features. The comparison between local and global geoids at the same points gives the possibility of detecting those areas where the contribution of local geoids is more prominent. Figure 11 presents three geoid models taken as an example for such an assessment.

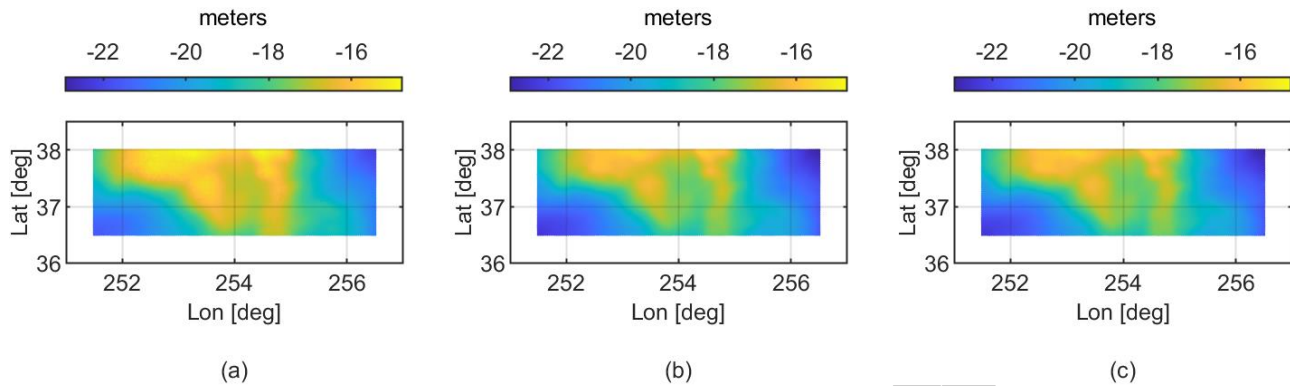

**Figure 11. Local and global geoid models. The three panels show the undulation over the Colorado (US) area with respect to the reference ellipsoid of: (a) ColWLSC2020; (b) EIGEN-6C4; (c) EGM2008.**

390

The first model is the recent ColWLSC2020 (Barzaghi et al., 2020b) gravimetric geoid model, computed by the Department of Civil and Environmental Engineering, Politecnico di Milano. This model has been computed in the frame of the International Association of Geodesy Joint Working Group 2.2.2 "The 1 cm geoid experiment" and the so called "Colorado experiment". The area covered by the model is  $251.5^{\circ}\text{E} \leq \text{longitude} \leq 256.5^{\circ}\text{E}$ ,  $36.5^{\circ}\text{N} \leq \text{latitude} \leq 38^{\circ}\text{N}$  with a grid spacing of 2' in both latitude and longitude. The computation is based on the remove-compute-restore technique with XGM2016 (Pail et al., 2017) being used as a reference field. The topographic effects were treated using a Residual Terrain Correction (RTC) by solving the spectral filter problem of RTC using the Earth2014 and ERTM2160 models. The input gravity data include terrestrial and airborne data, that were combined by Least-Squares Collocation (LSC). The final estimation was carried out using Windowed LSC (WLSC). The mean accuracy of the geoid model, when compared against GSVS17 GPS/leveling, is at the 2.4-2.8 cm level. The second and third models are two of the most widespread global geoid models, namely EIGEN-6C4 (Förste et al., 2014) and EGM2008 (Pavlis et al., 2012), both computed up to degree and order 2190 on the same  $2' \times 2'$  grid of ColWLSC2020.

395

For their comparison, a plane fitting their differences has been estimated and removed to reduce the impact of possible mismatches due to different reference frames and height datums. Table 4 shows the main statistics of the differences between these three geoid models.

405

**Table 4. Statistics of the differences between the analysed Colorado geoids.**

| Geoid A     | Geoid B   | Grid Resolution | Std [m] | Min [m] | Max [m] |
|-------------|-----------|-----------------|---------|---------|---------|
| ColWLSC2020 | EIGEN-6C4 | $2' \times 2'$  | 0.047   | -0.360  | 0.234   |
| ColWLSC2020 | EGM2008   | $2' \times 2'$  | 0.049   | -0.355  | 0.209   |
| EIGEN-6C4   | EGM2008   | $2' \times 2'$  | 0.025   | -0.046  | 0.061   |

410 From these statistics, it can be noted that over this area the two global models are quite in agreement, with differences of at most few centimeters. When compared to the local model, the amplitude of the differences increases of one order of magnitude with a standard deviation that becomes almost double the standard deviation of the residuals between the two global models. Figure 12 shows the spatial distribution of such residuals.

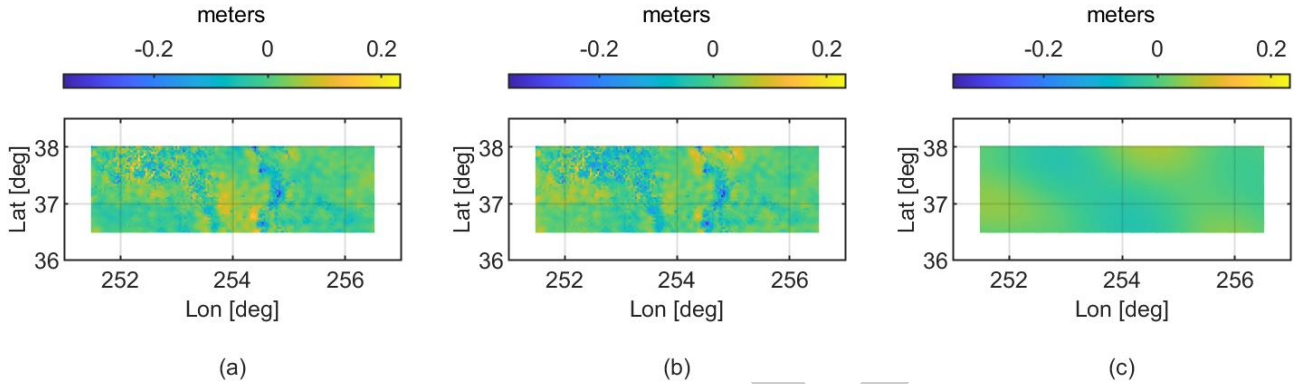

**Figure 12. Difference between the analysed Colorado geoids: (a) ColWLSC2020 – EIGEN-6C4; (b) ColWLSC2020 – EGM2008; (c) EIGEN-6C4 – EGM2008.**

As one can see, the main differences can be found on the Rocky Mountains along the meridian at 255° E and, in smaller part, 420 in the NW region of the considered area. Taking into account that the standard deviations  $\sigma$  of the residuals between the local geoid model and the two global models are almost identical, the agreement between these models can be evaluated on the basis of the percentage of grid points where all the three models differ by less than one, two, three times  $\sigma$ . As shown in Figure 13, 70% of the points differ by less than 0.049 m, 93% by less than 0.098 m and 98% by less than 0.147 m.

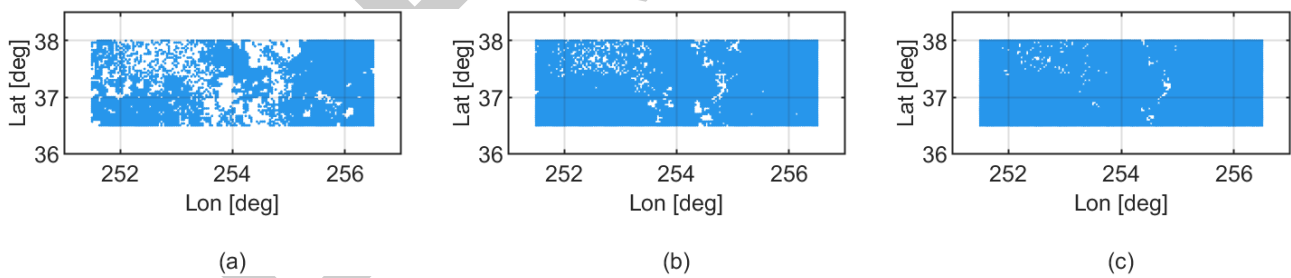

**Figure 13. Agreement of local Colorado geoid model with respect to both global models: (a) residuals below  $1\sigma$ ; (b) residuals below  $2\sigma$ ; (c) residuals below  $3\sigma$  are shown in blue**

Being the model ColWLSC2020 compared against GSVS17 GPS/levelling with residuals of about 2.5 cm, it seems that the global models suffer of missing information in this area, making the local geoid model more reliable for investigations requiring high level of accuracy.

## 5 Conclusions

ISG is an official worldwide IAG service hosted at Politecnico di Milano aiming at supporting the geodetic community. One of the main activities of ISG is to collect and redistribute regional geoid models at a worldwide scale, making available to users geoid models published by different authors, at different resolutions, referring to different editions and areas, from local to global scale. Before dissemination, the geoids collected in the ISG repository are harmonized through a pre-processing step that validate and convert in a unique format all available data. Since its foundation in 1992, ISG promotes the education for geoid computation, through international schools and special trainings on geoid estimation. The availability of one worldwide archive of regional and local geoids allows to easily find, access and exploit these models, but also to perform comparative analyses, in a research perspective. For instance, one can compare the evolution over time of the same geoid model, as showed in this paper with the assessment of the Japanese geoids of the GSIGEO series. Another example has been provided assessing the three different geoid models available for Sudan and South-Sudan, highlighting the areas of agreement. In addition, a comparison between a local geoid model stored in the ISG repository and the corresponding counterpart synthesized from a global model stored in the ICGEM repository has been presented, covering the Colorado (USA) region which were has been recently used as test field for an IAG study on geoid determination. ~~In addition, the comparison of different geoid models covering the same area have been presented, analysing the area of São Paulo in Brazil covered by both local, national and continental geoids.~~ ISG service is continuously enriching its geoid repository in order to offer to the users a more complete panorama of the geoid models available worldwide and organizing the next geoid schools to support the geodetic community. Concerning the future plans, we will work on improving both the data platform and the data exploitation. As for the website, the idea is to transform the geoid repository into a web-GIS with a more organized database, thus allowing geographical queries. This also implies an optimized storage of the geoid models as well as the development of other web-services to access the data and to compare them with other databases, e.g. global models from the ICGEM website. As for the data exploitation, we would like to increase the number of potential users, especially for administrative and commercial applications. This means becoming a recognized and certified reference institution not only for the scientific community, e.g. by delivering outputs that can be directly assimilated by commercial devices and software such as GNSS receivers.

## Data Availability

All geoid models used in this analysis are freely accessible via the ISG geoid repository where they can be discovered via an alphabetical list or a map ([https://www.isgeoid.polimi.it/Geoid/geoid\\_rep.html](https://www.isgeoid.polimi.it/Geoid/geoid_rep.html)). All the DOI-referenced regional geoid models of ISG can be also accessed via <https://dataservices.gfz-potsdam.de/portal/?fq=subject:isg>.

## References

- Abdalla, A.: Determination of a gravimetric geoid model of Sudan using the KTH method, MSc thesis, Royal Institute of Technology (KTH), Stockholm, Sweden, 2009
- 465 Barzaghi, R., Migliaccio, F., Reguzzoni, M., and Albertella, A.: The Earth gravity field in the time of satellites, *Rendiconti Lincei*, 26, 13–23, <https://doi.org/10.1007/s12210-015-0382-9>, 2015
- Barzaghi, R., Carrion D., Reguzzoni M., and Venuti G.: A feasibility study on the unification of the Italian height systems using GNSS-leveling data and global satellite gravity models, Rizos C., Willis P. (eds) *IAG 150 Years, International Association of Geodesy Symposia*, 143, 281-288, Springer, Cham, [https://doi.org/10.1007/1345\\_2015\\_35](https://doi.org/10.1007/1345_2015_35), 2015
- 470 Barzaghi, R.; Carrion, D.; Koç, Ö.: The PoliMI quasi-geoid based on windowed Least-Squares Collocation for the Colorado Experiment: ColWLSC2020. V. 1.0. GFZ Data Services. <https://doi.org/10.5880/isg.2020.001>, 2020a
- 475 Barzaghi, R.; Carrion, D.; Koç, Ö.: The PoliMI geoid based on windowed Least-Squares Collocation for the Colorado Experiment: ColWLSC2020. V. 1.0. GFZ Data Services. <https://doi.org/10.5880/isg.2020.002>, 2020b
- Bingham, R. J., Haines K., and Hughes C. W.: Calculating the ocean's mean dynamic topography from a mean sea surface and a geoid, *Journal of Atmospheric and Oceanic Technology*, 25, 1808–1822, <https://doi.org/10.1175/2008JTECHO568.1>, 2008
- 480 Cerri D. and Fuggetta A.: Open standards, open formats, and open source, *Journal of Systems and Software*, 80, 11, 1930-1937, <https://doi.org/10.1016/j.jss.2007.01.048>, 2007
- 485 Chan, L. M. and Zeng, M. L.: Metadata interoperability and standardization – A study of methodology Part 1, *D-Lib Magazine*, 12, 6, 2006 URL: <http://www.dlib.org/dlib/june06/zeng/06zeng.html> (last access 1 September 2020)

- Data Citation Synthesis Group: Joint declaration of data citation principles, FORCE11, <https://doi.org/10.25490/a97f-egyk>,  
490 2014
- Fashir, H. H. and Kadir, M. A.: The Sudanese gravimetric geoid 1998: Stokesian approach, *IGeS Bulletin*, 10, 59-77, 2000
- Fenner, M., Crosas, M., Grethe, J. S., Kennedy, D., Hermjakob, H., Rocca-Serra, P., Durand, G., Berjon, R., Karcher, S.,  
495 Martone, m., and Clark, T.: A data citation roadmap for scholarly data repositories, *Scientific Data*, 6, 28,  
<https://doi.org/10.1038/s41597-019-0031-8>, 2019
- Förste, C., Flechtner, F., Schmidt, R., König, R., Meyer, U., Stubenvoll, R., Rothacher, M., Barthelmes, F., Neumayer, K.H.,  
Biancale, R., Bruinsma, S.L., Lemoine, J.M.: A mean global gravity field model from the combination of satellite mission and  
500 altimetry/gravimetry surface gravity data; Poster presented at EGU General Assembly 2006, Vienna, Austria, 02-07 April  
2006 *Geophysical Research Abstracts*, Vol. 8, 03462, 2006, Vienna, Austria, 2006
- Forsberg, R. and Tscherning, R. R.: Overview manual for the GRAVSOFT Geodetic Gravity Field Modelling Programs, 2nd  
Ed. Technical report, DTU-Space, 2008  
505
- Fukuda, Y., Kuroda, J., Takabatake, Y., Itoh, J., and Murakami, M.: Improvement of JGEOID93 by the geoidal heights derived  
from GPS/leveling survey, Segawa J., Fujimoto H., Okubo S. (eds.) *Gravity, Geoid and Marine Geodesy*, International  
Association of Geodesy Symposia, , 117, 589-596, Springer Verlag, [https://doi.org/10.1007/978-3-662-03482-8\\_78](https://doi.org/10.1007/978-3-662-03482-8_78), 1997
- 510 Godah, W. and Krynski, J.: A new gravimetric geoid model for the area of Sudan using the least squares collocation and a  
GOCE-based GGM, Jin S., Barzaghi R. (eds) *IGFS 2014*, International Association of Geodesy Symposia, 144, 123-129,  
[https://doi.org/10.1007/1345\\_2015\\_196](https://doi.org/10.1007/1345_2015_196), Springer, Cham, 2015
- Heiskanen, W. A. and Moritz, H.: *Physical Geodesy*, W.H Freeman and co., United States, 1967  
515
- Hodson, S., Jones, S., Collins, S., Genova, F., Harrower, N., Laaksonen, L., Mietchen, D., Petrauskaitė, R. and Wittenburg,  
P.: Turning FAIR into reality: Final Report and Action Plan from the European Commission Expert Group on FAIR Data.  
<https://doi.org/10.2777/1524>, 2018
- 520 Ince, E. S., Barthelmes, F., Reißland, S., Elger, K., Förste, C., Flechtner, F., and Schuh, H.: ICGEM – 15 years of successful  
collection and distribution of global gravitational models, associated services and future plans, *Earth System Science Data*, 11,  
647-674, <https://doi.org/10.5194/essd-11-6>, 2019

- Knudsen, P., Bingham, R. J., Andersen, O., and Rio M. H.: A global mean dynamic topography and ocean circulation  
525 estimation using a preliminary GOCE gravity model, *Journal of Geodesy*, 85, 861–879, <https://doi.org/10.1007/s00190-011-0485-8>, 2011
- Kuroishi, Y.: A new geoid model for Japan, JGEOID2000. Sideris M. G. (ed.) *Gravity, Geoid and Geodynamics*, International  
530 Association of Geodesy Symposia, 123, 329-333, Springer Verlag, [https://doi.org/10.1007/978-3-662-04827-6\\_55](https://doi.org/10.1007/978-3-662-04827-6_55), 2000
- Longhorn, R.: Geospatial standards, interoperability, metadata semantics and spatial data infrastructure, background paper for  
NIEeS Workshop on Activating Metadata, Cambridge, United Kingdom, 6–7 July 2005
- Merson, R. and King-Hele, D.: Use of artificial satellites to explore the Earth's gravitational field: Results from Sputnik 2,  
535 *Nature*, 182, 640–641, <https://doi.org/10.1038/182640a0>, 1958
- Miyahara, B., Kodama, T., and Kuroishi, Y.: Development of new hybrid geoid model for Japan, "GSIGEO2011", *Bulletin of  
the Geographical Information Authority of Japan*, 62, 11-20, 2014
- 540 Pail, R., Goiginger, H., Schuh, W., Höck, E., Brockmann, J. M., Fecher, T., Gruber, T., Mayer-Gürr, T., Kusche, J., Jäggi, A.,  
and Rieser, D.: Combined satellite gravity field model GOCO01S derived from GOCE and GRACE *Geophysical Research  
Letters*, 37, L20314, <https://doi.org/10.1029/2010GL044906>, 2010
- Pail, R., Bruinsma, S., Migliaccio, F., Förste, C., Goiginger, H., Schuh, W., Höck, E., Reguzzoni, M., Brockmann, J. M.,  
545 Abrikosov, O., Veicherts, M., Fecher, T., Mayrhofer, R., Krasbutter, I., Sansò, F., and Tscherning, C. C.: First GOCE gravity  
field models derived by three different approaches, *Journal of Geodesy*, 85, 819, <https://doi.org/10.1007/s00190-011-0467-x>,  
2011
- Pail, R., Fecher, T., Barnes, D., Factor, J., Holmes, S., Gruber, T., Zingerle P.: The experimental gravity field model XGM2016.  
550 GFZ Data Services. <https://doi.org/10.5880/icgem.2017.003>, 2017
- Pavlis, N. K., Holmes, S. A., Kenyon, S. C., and Factor, J. K.: The development and evaluation of the Earth Gravitational  
Model 2008 (EGM2008), *Journal of Geophysical Research*, 117, B04406, <https://doi.org/10.1029/2011JB008916>, 2012



- 555 Reigber, C., Schmidt, R., Flechtner, F., König, R., Meyer, U., Neumayer, K.-H., Schwintzer, P. and Zhu, S. Y.: An Earth gravity field model complete to degree and order 150 from GRACE: EIGEN-GRACE02S, *Journal of Geodynamics*, 39(1), 1–10, <https://doi.org/10.1016/j.jog.2004.07.001>, 2005
- Rummel, R. and Teunissen, P., Height datum definition, height datum connection and the role of the geodetic boundary value problem, *Bulletin Géodésique*, 62, 477–498, <https://doi.org/10.1007/BF02520239>, 1988
- 560 Sansò, F. and Usai, S.: Height datum and local geodetic datum in the theory of geodetic boundary value problems, *Allgemeine Vermessungsnachrichten*, Wichmann, Heft 8–9, 343– 385, 1995
- 565 Sansò, F. and Sideris, M. G.: *Geoid Determination: Theory and Methods*, Springer Nature, Switzerland, <https://doi.org/10.1007/978-3-540-74700-0>, 2013
- Sansò, F., Reguzzoni, M., and Barzaghi, R.: *Geodetic Heights*, Springer Nature, Switzerland, <https://doi.org/10.1007/978-3-030-10454-2>, 2019
- 570 Wilkinson, M. D., Dumontier, M., Aalbersberg, Ij. J., Appleton, G., Axton, M., Baak, A., ... and Mons, B.: The FAIR Guiding Principles for scientific data management and stewardship, *Sci Data*, 3(1), <https://doi.org/10.1038/sdata.2016.18>, 2016
